# Supplementary material
Source: publisher figshare collection journal article supplement (https://acs.figshare.com/ndownloader/files/4777603)
Supplement: Supplementary file 1 [file 4777603]

data_publication_text
_publ_requested_journal          'Inorg. Chem.'
_publ_contact_author_name        'Kenneth W. Henderson'
_publ_contact_author_address     
;University of Notre Dame 
Department of Chemistry and Biochemistry
251 Nieuwland Science Hall   
Notre Dame, IN 46556-5670
USA
;
_publ_contact_author_email       khenders@nd.edu
_publ_contact_author_phone       011(574)6318025
_publ_contact_author_fax         011(574)6316652
loop_
_publ_author_name
_publ_author_address
'Rood, Jeffrey A.'
;University of Notre Dame 
Department of Chemistry and Biochemistry
251 Nieuwland Science Hall   
Notre Dame, IN 46556-5670
USA
;
'Noll, Bruce C.'
;University of Notre Dame 
Department of Chemistry and Biochemistry
251 Nieuwland Science Hall   
Notre Dame, IN 46556-5670
USA
;
'Henderson, Kenneth W.'
;University of Notre Dame 
Department of Chemistry and Biochemistry
251 Nieuwland Science Hall   
Notre Dame, IN 46556-5670
USA
; 
data_jr33

_audit_creation_method           SHELXL-97
_chemical_name_systematic        ?
_chemical_name_common            ?
_chemical_melting_point          ?
_chemical_formula_moiety         'C6 H6 Mg3 O12, O.5(C4 H10 O)'
_chemical_formula_sum            'C8 H11 Mg3 O12.50'
_chemical_formula_weight         380.10

loop_
_atom_type_symbol
_atom_type_description
_atom_type_scat_dispersion_real
_atom_type_scat_dispersion_imag
_atom_type_scat_source
C C 0.0033 0.0016 'International Tables Vol C Tables 4.2.6.8 and 6.1.1.4'
H H 0.0000 0.0000 'International Tables Vol C Tables 4.2.6.8 and 6.1.1.4'
O O 0.0106 0.0060 'International Tables Vol C Tables 4.2.6.8 and 6.1.1.4'
Mg Mg 0.0486 0.0363 'International Tables Vol C Tables 4.2.6.8 and 6.1.1.4'

_symmetry_cell_setting           monoclinic
_symmetry_space_group_name_H-M   'P 21/n'
_symmetry_space_group_name_Hall  '-P 2yn'
_symmetry_int_tables_number      14

loop_
_symmetry_equiv_pos_as_xyz
'x, y, z'
'-x+1/2, y+1/2, -z+1/2'
'-x, -y, -z'
'x-1/2, -y-1/2, z-1/2'

_cell_length_a                   11.3805(4)
_cell_length_b                   9.8406(3)
_cell_length_c                   14.5057(5)
_cell_angle_alpha                90.00
_cell_angle_beta                 91.429(2)
_cell_angle_gamma                90.00
_cell_volume                     1624.00(9)
_cell_formula_units_Z            4
_cell_measurement_temperature    293(2)
_cell_measurement_reflns_used    8677
_cell_measurement_theta_min      2.3027
_cell_measurement_theta_max      34.3137

_exptl_crystal_description       parallelepiped
_exptl_crystal_colour            colorless
_exptl_crystal_size_max          0.28
_exptl_crystal_size_mid          0.22
_exptl_crystal_size_min          0.20
_exptl_crystal_density_meas      ?
_exptl_crystal_density_diffrn    1.555
_exptl_crystal_density_method    'not measured'
_exptl_crystal_F_000             780
_exptl_absorpt_coefficient_mu    0.246
_exptl_absorpt_correction_type   multi-scan
_exptl_absorpt_correction_T_min  0.94
_exptl_absorpt_correction_T_max  0.96
_exptl_absorpt_process_details   
; Blessing, R.H. (1995) Acta Cryst. A51, 33-38.

Sheldrick, G.M. (2004) SADABS, University of G\:ottingen, Germany
;

_exptl_special_details           
; 
 CheckCIF prefers Z=2 however we have kept Z=4 to keep consistent with
 the others in this series. 
;

_diffrn_ambient_temperature      100(2)
_diffrn_radiation_probe          x-ray
_diffrn_radiation_type           MoK\a
_diffrn_radiation_wavelength     0.71073
_diffrn_source                   'fine-focus sealed tube'
_diffrn_source_type              'Siemens KFFMO2K-90'
_diffrn_radiation_monochromator  graphite
_diffrn_measurement_device_type  'Bruker X8-ApexII CCD Diffractometer'
_diffrn_measurement_method       '\f and \w scans'
_diffrn_detector_area_resol_mean 8.33
_diffrn_standards_number         ?
_diffrn_standards_interval_count ?
_diffrn_standards_interval_time  ?
_diffrn_standards_decay_%        ?
_diffrn_reflns_number            49843
_diffrn_reflns_av_R_equivalents  0.0436
_diffrn_reflns_av_sigmaI/netI    0.0290
_diffrn_reflns_limit_h_min       -18
_diffrn_reflns_limit_h_max       17
_diffrn_reflns_limit_k_min       -15
_diffrn_reflns_limit_k_max       15
_diffrn_reflns_limit_l_min       -23
_diffrn_reflns_limit_l_max       22
_diffrn_reflns_theta_min         2.25
_diffrn_reflns_theta_max         34.40
_reflns_number_total             6798
_reflns_number_gt                5461
_reflns_threshold_expression     >2sigma(I)

_computing_data_collection       'APEX2 (Bruker, 2004)'
_computing_cell_refinement       'APEX2/SAINT (Bruker, 2004)'
_computing_data_reduction        'SAINT/XPREP (Bruker, 2004; Sheldrick, 2003)'
_computing_structure_solution    'XS (Sheldrick, 2001)'
_computing_structure_refinement  'XL (Sheldrick, 2001)'
_computing_molecular_graphics    'XP (Sheldrick, 1998)'
_computing_publication_material  'XCIF (Sheldrick, 2001)/enCIFer (CCDC, 2004)'

_refine_special_details          
; 
 Refinement of F^2^ against ALL reflections.  The weighted R-factor wR and 
 goodness of fit S are based on F^2^, conventional R-factors R are based 
 on F, with F set to zero for negative F^2^. The threshold expression of 
 F^2^ > 2sigma(F^2^) is used only for calculating R-factors(gt) etc. and is 
 not relevant to the choice of reflections for refinement.  R-factors based 
 on F^2^ are statistically about twice as large as those based on F, and R- 
 factors based on ALL data will be even larger. 
;

_refine_ls_structure_factor_coef Fsqd
_refine_ls_matrix_type           full
_refine_ls_weighting_scheme      calc
_refine_ls_weighting_details     
'calc w=1/[\s^2^(Fo^2^)+(0.0479P)^2^+0.7929P] where P=(Fo^2^+2Fc^2^)/3'
_atom_sites_solution_primary     direct
_atom_sites_solution_secondary   difmap
_atom_sites_solution_hydrogens   geom
_refine_ls_hydrogen_treatment    constr
_refine_ls_extinction_method     none
_refine_ls_extinction_coef       ?
_refine_ls_number_reflns         6798
_refine_ls_number_parameters     260
_refine_ls_number_restraints     0
_refine_ls_R_factor_all          0.0628
_refine_ls_R_factor_gt           0.0468
_refine_ls_wR_factor_ref         0.1363
_refine_ls_wR_factor_gt          0.1294
_refine_ls_goodness_of_fit_ref   1.433
_refine_ls_restrained_S_all      1.433
_refine_ls_shift/su_max          0.000
_refine_ls_shift/su_mean         0.000

loop_
_atom_site_label
_atom_site_type_symbol
_atom_site_fract_x
_atom_site_fract_y
_atom_site_fract_z
_atom_site_U_iso_or_equiv
_atom_site_adp_type
_atom_site_occupancy
_atom_site_symmetry_multiplicity
_atom_site_calc_flag
_atom_site_refinement_flags
_atom_site_disorder_assembly
_atom_site_disorder_group
Mg1 Mg 0.25647(4) 0.41905(5) 0.63437(4) 0.00875(10) Uani 1 1 d . . .
Mg2 Mg 0.0000 0.5000 0.5000 0.00987(14) Uani 1 2 d S . .
Mg3 Mg 0.26071(5) 0.10922(5) 0.68940(4) 0.00920(10) Uani 1 1 d . . .
Mg4 Mg 0.5000 0.5000 0.5000 0.01028(14) Uani 1 2 d S . .
O1 O 0.13109(9) 0.50375(10) 0.71982(8) 0.01056(19) Uani 1 1 d . . .
O2 O -0.03690(10) 0.50172(12) 0.63788(8) 0.0152(2) Uani 1 1 d . . .
O3 O 0.15722(9) 0.24187(10) 0.61046(8) 0.01070(19) Uani 1 1 d . . .
O4 O 0.01837(10) 0.29229(11) 0.50396(8) 0.0144(2) Uani 1 1 d . . .
O5 O 0.39986(9) 0.34726(10) 0.56333(8) 0.01102(19) Uani 1 1 d . . .
O6 O 0.39008(10) 0.12511(11) 0.59708(8) 0.0131(2) Uani 1 1 d . . .
O7 O 0.30748(9) 0.29732(10) 0.74687(7) 0.01045(19) Uani 1 1 d . . .
O8 O 0.18714(10) -0.05988(11) 0.63259(8) 0.0132(2) Uani 1 1 d . . .
O9 O 0.18277(9) 0.52389(11) 0.52466(8) 0.01094(19) Uani 1 1 d . . .
O10 O 0.34981(10) 0.60195(11) 0.46589(9) 0.0147(2) Uani 1 1 d . . .
O11 O 0.34829(9) 0.57942(10) 0.69661(8) 0.01091(19) Uani 1 1 d . . .
O12 O 0.51428(10) 0.61049(12) 0.61969(9) 0.0157(2) Uani 1 1 d . . .
C1 C 0.02053(13) 0.51646(15) 0.71069(11) 0.0129(3) Uani 1 1 d . . .
H1 H -0.0208 0.5387 0.7631 0.015 Uiso 1 1 calc R . .
C2 C 0.07663(14) 0.21114(14) 0.55138(11) 0.0139(3) Uani 1 1 d . . .
H2 H 0.0602 0.1193 0.5432 0.017 Uiso 1 1 calc R . .
C3 C 0.43339(13) 0.22355(14) 0.55705(11) 0.0130(3) Uani 1 1 d . . .
H3 H 0.4961 0.2060 0.5189 0.016 Uiso 1 1 calc R . .
C4 C 0.17124(13) -0.17257(14) 0.66875(11) 0.0123(3) Uani 1 1 d . . .
H4 H 0.1411 -0.2412 0.6310 0.015 Uiso 1 1 calc R . .
C5 C 0.24174(13) 0.59788(15) 0.46970(11) 0.0129(3) Uani 1 1 d . . .
H5 H 0.1993 0.6534 0.4291 0.015 Uiso 1 1 calc R . .
C6 C 0.44822(14) 0.63435(15) 0.68384(11) 0.0141(3) Uani 1 1 d . . .
H6 H 0.4736 0.6985 0.7270 0.017 Uiso 1 1 calc R . .
O1S O 0.7188(4) 0.1645(4) 0.7007(3) 0.0510(10) Uani 0.50 1 d P . .
C4S C 0.6485(4) 0.3675(5) 0.7860(4) 0.0364(10) Uani 0.50 1 d P . .
H4S1 H 0.6528 0.4205 0.7306 0.055 Uiso 0.50 1 calc PR A .
H4S2 H 0.6654 0.4244 0.8385 0.055 Uiso 0.50 1 calc PR . .
H4S3 H 0.5710 0.3301 0.7907 0.055 Uiso 0.50 1 calc PR . .
C3S C 0.7364(4) 0.2545(5) 0.7833(5) 0.0441(13) Uani 0.50 1 d P A .
H3S1 H 0.7305 0.2002 0.8388 0.053 Uiso 0.50 1 calc PR . .
H3S2 H 0.8149 0.2929 0.7826 0.053 Uiso 0.50 1 calc PR . .
C2S C 0.7802(7) 0.0494(8) 0.6928(5) 0.0274(17) Uani 0.278(6) 1 d P A 1
H2S1 H 0.7747 -0.0024 0.7494 0.033 Uiso 0.278(6) 1 calc PR A 1
H2S2 H 0.8623 0.0716 0.6845 0.033 Uiso 0.278(6) 1 calc PR A 1
C1S C 0.7373(9) -0.0363(12) 0.6134(6) 0.043(2) Uani 0.278(6) 1 d P A 1
H1S1 H 0.6542 -0.0503 0.6177 0.064 Uiso 0.278(6) 1 calc PR A 1
H1S2 H 0.7768 -0.1225 0.6151 0.064 Uiso 0.278(6) 1 calc PR A 1
H1S3 H 0.7536 0.0090 0.5565 0.064 Uiso 0.278(6) 1 calc PR A 1
C1X C 0.8623(8) -0.0292(9) 0.6359(8) 0.028(2) Uani 0.222(6) 1 d P A 2
H1X1 H 0.9226 0.0169 0.6713 0.042 Uiso 0.222(6) 1 calc PR A 2
H1X2 H 0.8912 -0.0511 0.5761 0.042 Uiso 0.222(6) 1 calc PR A 2
H1X3 H 0.8408 -0.1112 0.6670 0.042 Uiso 0.222(6) 1 calc PR A 2
C2X C 0.7630(10) 0.0559(11) 0.6260(8) 0.033(2) Uani 0.222(6) 1 d P A 2
H2X1 H 0.6969 -0.0042 0.6139 0.039 Uiso 0.222(6) 1 calc PR A 2
H2X2 H 0.7740 0.1070 0.5697 0.039 Uiso 0.222(6) 1 calc PR A 2

loop_
_atom_site_aniso_label
_atom_site_aniso_U_11
_atom_site_aniso_U_22
_atom_site_aniso_U_33
_atom_site_aniso_U_23
_atom_site_aniso_U_13
_atom_site_aniso_U_12
Mg1 0.0094(2) 0.00689(19) 0.0099(2) -0.00006(16) -0.00119(17) 0.00028(16)
Mg2 0.0090(3) 0.0097(3) 0.0108(3) 0.0007(2) -0.0019(2) -0.0001(2)
Mg3 0.0105(2) 0.00688(19) 0.0102(2) 0.00085(16) -0.00131(17) 0.00002(16)
Mg4 0.0096(3) 0.0095(3) 0.0118(3) 0.0012(2) 0.0007(2) -0.0007(2)
O1 0.0095(4) 0.0099(4) 0.0122(5) -0.0018(3) -0.0020(4) 0.0003(3)
O2 0.0117(5) 0.0216(5) 0.0120(5) 0.0000(4) -0.0024(4) -0.0008(4)
O3 0.0109(4) 0.0093(4) 0.0117(5) 0.0007(3) -0.0035(4) -0.0004(3)
O4 0.0151(5) 0.0108(4) 0.0171(5) 0.0005(4) -0.0065(4) 0.0009(4)
O5 0.0116(4) 0.0086(4) 0.0129(5) 0.0010(4) 0.0011(4) 0.0003(3)
O6 0.0155(5) 0.0091(4) 0.0150(5) 0.0015(4) 0.0024(4) -0.0001(3)
O7 0.0130(4) 0.0080(4) 0.0102(5) -0.0003(3) -0.0023(4) -0.0003(3)
O8 0.0184(5) 0.0090(4) 0.0122(5) 0.0013(4) -0.0026(4) -0.0020(4)
O9 0.0102(4) 0.0114(4) 0.0112(5) 0.0022(4) -0.0009(4) -0.0004(3)
O10 0.0109(5) 0.0150(5) 0.0183(5) 0.0044(4) 0.0000(4) -0.0007(4)
O11 0.0106(4) 0.0093(4) 0.0129(5) -0.0007(3) 0.0006(4) -0.0010(3)
O12 0.0147(5) 0.0178(5) 0.0146(5) -0.0019(4) 0.0023(4) -0.0041(4)
C1 0.0114(6) 0.0150(6) 0.0122(6) -0.0007(5) 0.0001(5) 0.0002(5)
C2 0.0150(6) 0.0088(5) 0.0176(7) -0.0011(5) -0.0057(5) -0.0007(5)
C3 0.0132(6) 0.0110(5) 0.0148(7) 0.0006(5) 0.0029(5) 0.0011(5)
C4 0.0157(6) 0.0092(5) 0.0118(6) -0.0010(4) -0.0024(5) -0.0006(4)
C5 0.0123(6) 0.0131(5) 0.0132(6) 0.0025(5) -0.0015(5) 0.0011(5)
C6 0.0143(6) 0.0132(6) 0.0149(7) -0.0023(5) 0.0009(5) -0.0043(5)
O1S 0.081(3) 0.045(2) 0.0267(18) 0.0032(15) 0.0034(19) -0.018(2)
C4S 0.035(2) 0.035(2) 0.039(3) -0.0012(19) -0.0017(19) 0.0018(18)
C3S 0.025(2) 0.037(2) 0.070(4) 0.023(2) -0.007(2) -0.0002(17)
C2S 0.028(3) 0.032(3) 0.022(4) 0.000(3) -0.003(3) -0.001(3)
C1S 0.045(5) 0.057(6) 0.027(4) -0.016(4) 0.012(4) -0.011(4)
C1X 0.023(4) 0.024(4) 0.039(5) 0.009(4) 0.016(4) 0.000(3)
C2X 0.040(5) 0.029(5) 0.029(5) 0.008(4) 0.008(4) 0.008(4)

_geom_special_details            
; 
 All esds (except the esd in the dihedral angle between two l.s. planes) 
 are estimated using the full covariance matrix.  The cell esds are taken 
 into account individually in the estimation of esds in distances, angles 
 and torsion angles; correlations between esds in cell parameters are only 
 used when they are defined by crystal symmetry.  An approximate (isotropic) 
 treatment of cell esds is used for estimating esds involving l.s. planes. 
;

loop_
_geom_bond_atom_site_label_1
_geom_bond_atom_site_label_2
_geom_bond_distance
_geom_bond_site_symmetry_2
_geom_bond_publ_flag
Mg1 O9 2.0576(12) . ?
Mg1 O5 2.0756(12) . ?
Mg1 O11 2.0858(11) . ?
Mg1 O1 2.0869(12) . ?
Mg1 O7 2.0947(12) . ?
Mg1 O3 2.1016(11) . ?
Mg1 Mg3 3.1518(7) . ?
Mg1 Mg3 3.1780(7) 2_556 ?
Mg1 Mg4 3.5191(5) . ?
Mg1 Mg2 3.5593(5) . ?
Mg2 O2 2.0540(12) . ?
Mg2 O2 2.0540(12) 3_566 ?
Mg2 O4 2.0552(11) 3_566 ?
Mg2 O4 2.0553(11) . ?
Mg2 O9 2.1149(11) . ?
Mg2 O9 2.1149(11) 3_566 ?
Mg2 Mg1 3.5593(5) 3_566 ?
Mg3 O6 2.0208(13) . ?
Mg3 O8 2.0285(12) . ?
Mg3 O1 2.0607(11) 2_546 ?
Mg3 O3 2.0821(11) . ?
Mg3 O7 2.0934(11) . ?
Mg3 O11 2.1122(13) 2_546 ?
Mg3 Mg1 3.1781(7) 2_546 ?
Mg4 O10 2.0324(11) 3_666 ?
Mg4 O10 2.0324(11) . ?
Mg4 O12 2.0516(12) . ?
Mg4 O12 2.0516(12) 3_666 ?
Mg4 O5 2.1104(11) 3_666 ?
Mg4 O5 2.1105(11) . ?
Mg4 Mg1 3.5191(5) 3_666 ?
O1 C1 1.2681(18) . ?
O1 Mg3 2.0607(11) 2_556 ?
O2 C1 1.2367(18) . ?
O3 C2 1.2759(17) . ?
O4 C2 1.2360(18) . ?
O5 C3 1.2797(17) . ?
O6 C3 1.2381(18) . ?
O7 C4 1.2767(18) 2_556 ?
O8 C4 1.2419(17) . ?
O9 C5 1.2817(19) . ?
O10 C5 1.2332(19) . ?
O11 C6 1.2768(18) . ?
O11 Mg3 2.1121(13) 2_556 ?
O12 C6 1.233(2) . ?
C1 H1 0.9300 . ?
C2 H2 0.9300 . ?
C3 H3 0.9300 . ?
C4 O7 1.2766(18) 2_546 ?
C4 H4 0.9300 . ?
C5 H5 0.9300 . ?
C6 H6 0.9300 . ?
O1S C2S 1.338(9) . ?
O1S C3S 1.498(8) . ?
O1S C2X 1.612(12) . ?
C4S C3S 1.497(7) . ?
C4S H4S1 0.9600 . ?
C4S H4S2 0.9600 . ?
C4S H4S3 0.9600 . ?
C3S H3S1 0.9700 . ?
C3S H3S2 0.9700 . ?
C2S C1S 1.500(12) . ?
C2S H2S1 0.9700 . ?
C2S H2S2 0.9700 . ?
C1S H1S1 0.9600 . ?
C1S H1S2 0.9600 . ?
C1S H1S3 0.9600 . ?
C1X C2X 1.411(14) . ?
C1X H1X1 0.9600 . ?
C1X H1X2 0.9600 . ?
C1X H1X3 0.9600 . ?
C2X H2X1 0.9700 . ?
C2X H2X2 0.9700 . ?

loop_
_geom_angle_atom_site_label_1
_geom_angle_atom_site_label_2
_geom_angle_atom_site_label_3
_geom_angle
_geom_angle_site_symmetry_1
_geom_angle_site_symmetry_3
_geom_angle_publ_flag
O9 Mg1 O5 95.57(5) . . ?
O9 Mg1 O11 98.37(5) . . ?
O5 Mg1 O11 94.64(5) . . ?
O9 Mg1 O1 89.29(5) . . ?
O5 Mg1 O1 171.30(5) . . ?
O11 Mg1 O1 77.49(4) . . ?
O9 Mg1 O7 171.48(5) . . ?
O5 Mg1 O7 89.20(5) . . ?
O11 Mg1 O7 88.25(5) . . ?
O1 Mg1 O7 86.90(5) . . ?
O9 Mg1 O3 94.66(5) . . ?
O5 Mg1 O3 93.54(5) . . ?
O11 Mg1 O3 163.85(5) . . ?
O1 Mg1 O3 93.25(5) . . ?
O7 Mg1 O3 77.96(4) . . ?
O9 Mg1 Mg3 133.18(4) . . ?
O5 Mg1 Mg3 77.83(3) . . ?
O11 Mg1 Mg3 128.17(4) . . ?
O1 Mg1 Mg3 104.02(4) . . ?
O7 Mg1 Mg3 41.17(3) . . ?
O3 Mg1 Mg3 40.89(3) . . ?
O9 Mg1 Mg3 107.15(4) . 2_556 ?
O5 Mg1 Mg3 131.66(4) . 2_556 ?
O11 Mg1 Mg3 41.11(3) . 2_556 ?
O1 Mg1 Mg3 39.68(3) . 2_556 ?
O7 Mg1 Mg3 74.42(3) . 2_556 ?
O3 Mg1 Mg3 125.28(4) . 2_556 ?
Mg3 Mg1 Mg3 111.515(17) . 2_556 ?
O9 Mg1 Mg4 76.68(3) . . ?
O5 Mg1 Mg4 33.10(3) . . ?
O11 Mg1 Mg4 71.06(3) . . ?
O1 Mg1 Mg4 142.95(3) . . ?
O7 Mg1 Mg4 110.74(4) . . ?
O3 Mg1 Mg4 121.59(4) . . ?
Mg3 Mg1 Mg4 110.606(17) . . ?
Mg3 Mg1 Mg4 112.169(17) 2_556 . ?
O9 Mg1 Mg2 31.94(3) . . ?
O5 Mg1 Mg2 116.64(4) . . ?
O11 Mg1 Mg2 117.57(3) . . ?
O1 Mg1 Mg2 70.88(3) . . ?
O7 Mg1 Mg2 139.65(4) . . ?
O3 Mg1 Mg2 70.45(3) . . ?
Mg3 Mg1 Mg2 111.246(17) . . ?
Mg3 Mg1 Mg2 104.042(16) 2_556 . ?
Mg4 Mg1 Mg2 107.004(14) . . ?
O2 Mg2 O2 179.999(13) . 3_566 ?
O2 Mg2 O4 89.77(5) . 3_566 ?
O2 Mg2 O4 90.24(5) . . ?
O2 Mg2 O4 89.76(5) 3_566 . ?
O4 Mg2 O4 179.999(5) 3_566 . ?
O2 Mg2 O9 93.35(4) . . ?
O2 Mg2 O9 86.65(4) 3_566 . ?
O4 Mg2 O9 89.61(4) 3_566 . ?
O4 Mg2 O9 90.39(4) . . ?
O2 Mg2 O9 86.65(4) . 3_566 ?
O4 Mg2 O9 89.61(4) . 3_566 ?
O9 Mg2 O9 180.00(6) . 3_566 ?
O2 Mg2 Mg1 110.28(3) . 3_566 ?
O4 Mg2 Mg1 108.62(3) . 3_566 ?
O9 Mg2 Mg1 149.03(3) . 3_566 ?
O2 Mg2 Mg1 69.72(3) . . ?
O2 Mg2 Mg1 110.28(3) 3_566 . ?
O4 Mg2 Mg1 108.62(3) 3_566 . ?
O4 Mg2 Mg1 71.38(3) . . ?
O9 Mg2 Mg1 30.98(3) . . ?
O9 Mg2 Mg1 149.02(3) 3_566 . ?
Mg1 Mg2 Mg1 180.0 3_566 . ?
O6 Mg3 O8 95.42(5) . . ?
O6 Mg3 O1 91.65(5) . 2_546 ?
O8 Mg3 O1 94.61(5) . 2_546 ?
O6 Mg3 O3 89.92(5) . . ?
O8 Mg3 O3 93.95(5) . . ?
O1 Mg3 O3 171.11(5) 2_546 . ?
O6 Mg3 O7 90.76(5) . . ?
O8 Mg3 O7 170.19(5) . . ?
O1 Mg3 O7 92.81(5) 2_546 . ?
O3 Mg3 O7 78.42(4) . . ?
O6 Mg3 O11 168.92(5) . 2_546 ?
O8 Mg3 O11 87.69(5) . 2_546 ??
O3 Mg3 O11 100.51(5) . 2_546 ?
O7 Mg3 O11 87.68(5) . 2_546 ?
O6 Mg3 Mg1 76.36(3) . . ?
O8 Mg3 Mg1 133.40(4) . . ?
O1 Mg3 Mg1 130.86(4) 2_546 . ?
O3 Mg3 Mg1 41.35(3) . . ?
O7 Mg3 Mg1 41.20(3) . . ?
O11 Mg3 Mg1 109.09(3) 2_546 . ?
O6 Mg3 Mg1 129.72(4) . 2_546 ?
O8 Mg3 Mg1 79.09(4) . 2_546 ?
O3 Mg3 Mg1 140.01(4) . 2_546 ?
O7 Mg3 Mg1 102.74(4) . 2_546 ?
Mg1 Mg3 Mg1 140.58(2) . 2_546 ?
O10 Mg4 O10 180.00(7) 3_666 . ?
O10 Mg4 O12 90.41(5) 3_666 . ?
O10 Mg4 O12 89.59(5) . . ?
O10 Mg4 O12 90.41(5) . 3_666 ?
O12 Mg4 O12 180.00(5) . 3_666 ?
O10 Mg4 O5 90.14(4) . 3_666 ?
O12 Mg4 O5 87.63(4) . 3_666 ?
O10 Mg4 O5 90.14(4) 3_666 . ?
O10 Mg4 O5 89.86(4) . . ?
O12 Mg4 O5 92.37(4) . . ?
O12 Mg4 O5 87.63(4) 3_666 . ?
O5 Mg4 O5 180.0 3_666 . ?
O10 Mg4 Mg1 115.00(3) . 3_666 ?
O12 Mg4 Mg1 107.57(3) . 3_666 ?
O5 Mg4 Mg1 147.52(3) . 3_666 ?
O10 Mg4 Mg1 115.00(3) 3_666 . ?
O10 Mg4 Mg1 65.00(3) . . ?
O12 Mg4 Mg1 72.43(3) . . ?
O12 Mg4 Mg1 107.57(3) 3_666 . ?
O5 Mg4 Mg1 147.52(3) 3_666 . ?
O5 Mg4 Mg1 32.48(3) . . ?
Mg1 Mg4 Mg1 180.0 3_666 . ?
C1 O1 Mg3 126.34(10) . 2_556 ?
C1 O1 Mg1 131.97(10) . . ?
Mg3 O1 Mg1 100.03(5) 2_556 . ?
C1 O2 Mg2 135.73(11) . . ?
C2 O3 Mg3 127.45(9) . . ?
C2 O3 Mg1 132.99(10) . . ?
Mg3 O3 Mg1 97.76(5) . . ?
C2 O4 Mg2 135.31(10) . . ?
C3 O5 Mg1 126.78(10) . . ?
C3 O5 Mg4 118.77(10) . . ?
Mg1 O5 Mg4 114.42(5) . . ?
C3 O6 Mg3 132.57(10) . . ?
C4 O7 Mg3 128.85(9) 2_556 . ?
C4 O7 Mg1 131.03(9) 2_556 . ?
Mg3 O7 Mg1 97.63(5) . . ?
C4 O8 Mg3 128.61(10) . . ?
C5 O9 Mg1 123.80(9) . . ?
C5 O9 Mg2 119.07(9) . . ?
Mg1 O9 Mg2 117.09(5) . . ?
C5 O10 Mg4 143.78(10) . . ?
C6 O11 Mg1 134.10(10) . . ?
C6 O11 Mg3 126.69(10) . 2_556 ?
Mg1 O11 Mg3 98.41(5) . 2_556 ?
C6 O12 Mg4 134.62(11) . . ?
O2 C1 O1 125.42(15) . . ?
O2 C1 H1 117.3 . . ?
O1 C1 H1 117.3 . . ?
O4 C2 O3 125.96(13) . . ?
O4 C2 H2 117.0 . . ?
O3 C2 H2 117.0 . . ?
O6 C3 O5 126.02(15) . . ?
O6 C3 H3 117.0 . . ?
O5 C3 H3 117.0 . . ?
O8 C4 O7 125.87(13) . 2_546 ?
O8 C4 H4 117.1 . . ?
O7 C4 H4 117.1 2_546 . ?
O10 C5 O9 125.77(14) . . ?
O10 C5 H5 117.1 . . ?
O9 C5 H5 117.1 . . ?
O12 C6 O11 126.22(14) . . ?
O12 C6 H6 116.9 . . ?
O11 C6 H6 116.9 . . ?
C2S O1S C3S 120.6(5) . . ?
C2S O1S C2X 37.6(5) . . ?
C3S O1S C2X 153.0(6) . . ?
C3S C4S H4S1 109.5 . . ?
C3S C4S H4S2 109.5 . . ?
H4S1 C4S H4S2 109.5 . . ?
C3S C4S H4S3 109.5 . . ?
H4S1 C4S H4S3 109.5 . . ?
H4S2 C4S H4S3 109.5 . . ?
C4S C3S O1S 112.6(4) . . ?
C4S C3S H3S1 109.1 . . ?
O1S C3S H3S1 109.1 . . ?
C4S C3S H3S2 109.1 . . ?
O1S C3S H3S2 109.1 . . ?
H3S1 C3S H3S2 107.8 . . ?
O1S C2S C1S 112.4(7) . . ?
O1S C2S H2S1 109.1 . . ?
C1S C2S H2S1 109.1 . . ?
O1S C2S H2S2 109.1 . . ?
C1S C2S H2S2 109.1 . . ?
H2S1 C2S H2S2 107.8 . . ?
C2X C1X H1X1 109.5 . . ?
C2X C1X H1X2 109.5 . . ?
H1X1 C1X H1X2 109.5 . . ?
C2X C1X H1X3 109.5 . . ?
H1X1 C1X H1X3 109.5 . . ?
H1X2 C1X H1X3 109.5 . . ?
C1X C2X O1S 126.0(9) . . ?
C1X C2X H2X1 105.8 . . ?
O1S C2X H2X1 105.8 . . ?
C1X C2X H2X2 105.8 . . ?
O1S C2X H2X2 105.8 . . ?
H2X1 C2X H2X2 106.2 . . ?

_diffrn_measured_fraction_theta_max 0.995
_diffrn_reflns_theta_full        34.40
_diffrn_measured_fraction_theta_full 0.995
_refine_diff_density_max         0.629
_refine_diff_density_min         -0.514
_refine_diff_density_rms         0.103
_chemical_compound_source        Synthesized
_exptl_crystal_recrystallization_method 'From DMF at 110 C'
